# Supplementary material
Source: PubMed Central journal article supplement (PMC2800954)
Supplement: NIHMS152239-supplement-1_si_001.pdf [file NIHMS152239-supplement-1_si_001.pdf]

**0 Hour**

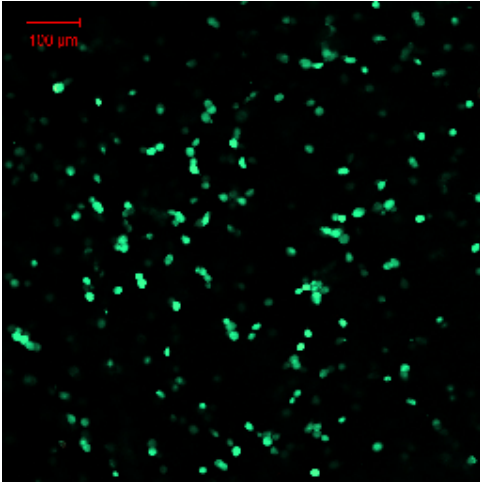

**1 Hour**

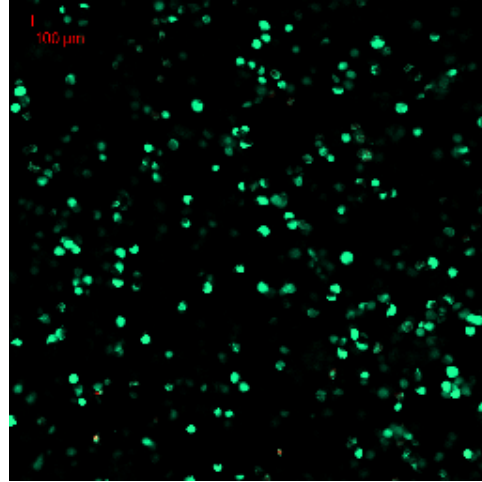

**24 Hour**

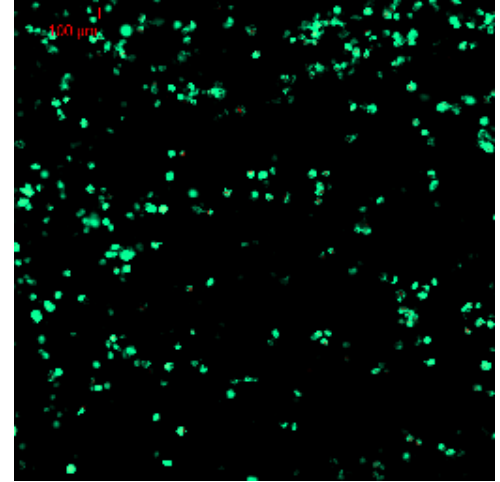

Fibroblast (NIH3T3) encapsulation using the GOX mediated redox initiation system with 4mM glucose, 1.25mM  $\text{Fe}^{+2}$ ,  $6.25 \times 10^{-7}$  M GOX, 15wt% PEGTA<sub>20000</sub>, 1mM CRGDS and 1X PBS. The effects of the GOX mediated initiation system on cell viability was tested using a LIVE/DEAD membrane integrity assay where live cells fluoresce green and dead cells fluoresce red. These representative pictures show cell-laden gels incubated in glucose containing DMEM media without catalase for either 0 or 1 hour or in glucose containing DMEM supplemented with  $2.0 \times 10^{-6}$  M of catalase enzyme for 24 hours.
